# Supplementary material
Source: PubMed Central journal article supplement (PMC3664187)
Supplement: NIHMS463774-supplement-01.pdf [file NIHMS463774-supplement-01.pdf]

**eTable 1** Characteristics of Offspring, Suicide Decedents and Surviving Parents by the Developmental Period of Offspring at the Time Parental Fatal Accident Occurred, Identified from Swedish Population-based Registries, 1973-2003

|                                                               | <b>Early<br/>childhood</b><br>(Ages 0-5)<br>(n=4,058) |      | <b>Later<br/>Childhood</b><br>(Ages 6-12)<br>(n=7,444) |      | <b>Adolescence</b><br>(Ages 13-17)<br>(n=7,241) |      | <b>Young<br/>Adulthood</b><br>(Ages 18-24)<br>(n=13,652) |      | <b>p-value</b> |
|---------------------------------------------------------------|-------------------------------------------------------|------|--------------------------------------------------------|------|-------------------------------------------------|------|----------------------------------------------------------|------|----------------|
| <i>Offspring</i>                                              | N                                                     | %    | N                                                      | %    | N                                               | %    | N                                                        | %    |                |
| Country of Birth: Sweden                                      | 3,975                                                 | 98   | 7,161                                                  | 96   | 6,940                                           | 96   | 13,162                                                   | 96   | 0.001          |
| Offspring Female                                              | 1,985                                                 | 49   | 3,606                                                  | 48   | 3,535                                           | 49   | 6,586                                                    | 48   | 0.81           |
| Year of Birth (Mean±SD)                                       | 1981                                                  | 7.4  | 1977                                                   | 8.8  | 1972                                            | 8.7  | 1966                                                     | 8.0  | 0.001          |
| Any Psychiatric<br>Hospitalization prior to<br>parental death | 1                                                     | 0.02 | 20                                                     | 0.3  | 63                                              | 0.9  | 284                                                      | 2.1  | 0.001          |
| <i>Deceased Parent</i>                                        |                                                       |      |                                                        |      |                                                 |      |                                                          |      |                |
| Country of Birth: Sweden                                      | 3,280                                                 | 81   | 6,185                                                  | 83   | 6,170                                           | 85   | 11,867                                                   | 87   | 0.001          |
| Year of Birth (Mean±SD)                                       | 1951                                                  | 9.5  | 1946                                                   | 10.6 | 1941                                            | 11.0 | 1935                                                     | 11.1 | 0.001          |
| Any Psychiatric<br>Hospitalization                            | 622                                                   | 15   | 1,760                                                  | 24   | 1,948                                           | 27   | 3,299                                                    | 24   | 0.001          |
| Age of Parent at Death<br>(Mean±SD)                           | 32.9                                                  | 7.4  | 40                                                     | 7.5  | 46                                              | 7.5  | 52                                                       | 7.8  | 0.001          |
| Parent Mother                                                 | 785                                                   | 19   | 1,619                                                  | 22   | 1,637                                           | 23   | 3,585                                                    | 26   | 0.001          |
| <i>Surviving Parent</i>                                       |                                                       |      |                                                        |      |                                                 |      |                                                          |      |                |
| Country of Birth: Sweden                                      | 3,331                                                 | 82   | 6,210                                                  | 84   | 6,087                                           | 85   | 11,759                                                   | 87   | 0.001          |
| Year of Birth (Mean±SD)                                       | 1953                                                  | 8.8  | 1959                                                   | 10.0 | 1943                                            | 10.4 | 1938                                                     | 10.4 | 0.001          |

|                                                             |     |   |     |   |     |   |     |   |      |
|-------------------------------------------------------------|-----|---|-----|---|-----|---|-----|---|------|
| Any Psychiatric<br>Hospitalization Prior to<br>Spouse Death | 265 | 7 | 508 | 7 | 554 | 8 | 944 | 7 | 0.09 |
|-------------------------------------------------------------|-----|---|-----|---|-----|---|-----|---|------|

---
